# Supplementary material for: Structural and electronic properties of tungsten nanoclusters by DFT and basin-hopping calculations
Source: Royal Society of Chemistry journal article supplement (doi:10.1039/c4ra02053g), 2014-01-01
Supplement: c4ra02053g1.pdf [file c4ra02053g1.pdf]

| 2D W nanoclusters                                                                   | Energy/atom (eV) | Average bond (Å) |
|-------------------------------------------------------------------------------------|------------------|------------------|
| 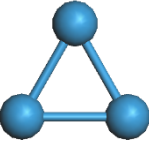   | 2.324            | 3.699            |
|    | 2.401            | 4.211            |
|    | 2.460            | 4.132            |
|    | 2.406            | 4.488            |
|  | 2.494            | 4.534            |
|  | 2.462            | 4.699            |
|  | 2.493            | 4.707            |

Large size W nanocluster by FS potential

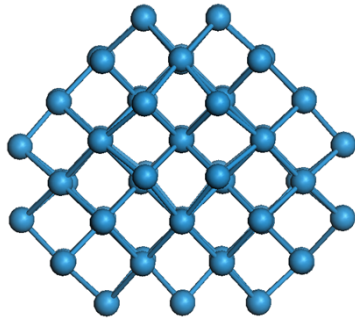

W<sub>100</sub>

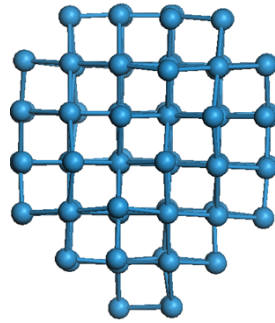

W<sub>102</sub>

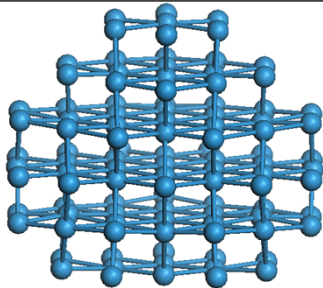

W<sub>104</sub>

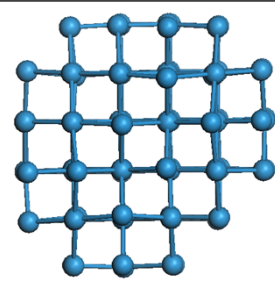

W<sub>105</sub>

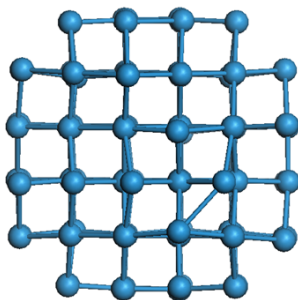

W<sub>106</sub>

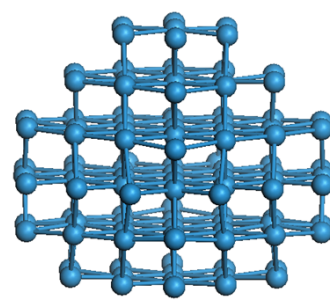

W<sub>109</sub>

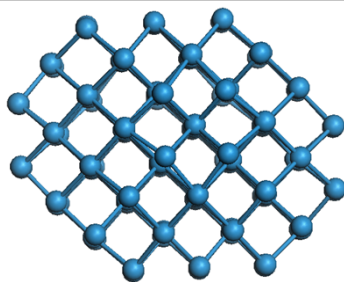

W<sub>114</sub>

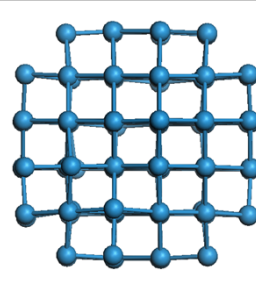

W<sub>116</sub>

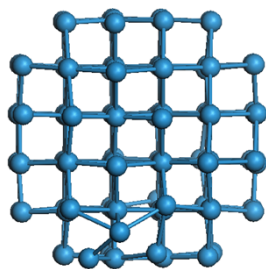

W<sub>117</sub>

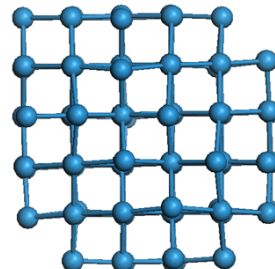

W<sub>118</sub>

Large size W nanocluster by TB potential

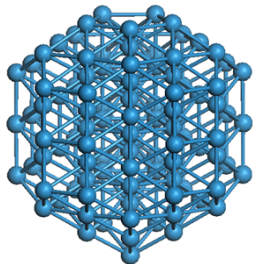

W<sub>100</sub>

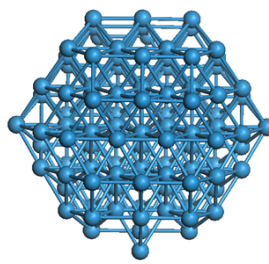

W<sub>105</sub>

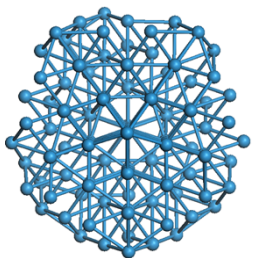

W<sub>109</sub>

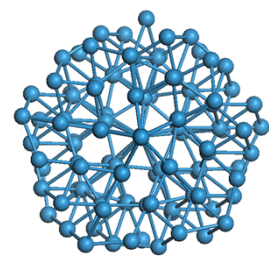

W<sub>111</sub>

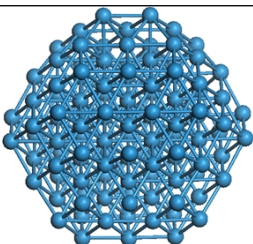

W<sub>112</sub>

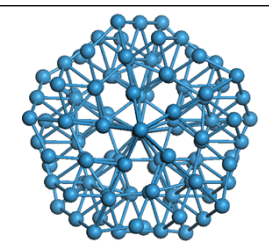

W<sub>116</sub>

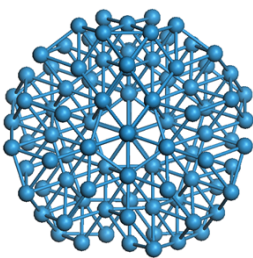

W<sub>117</sub>

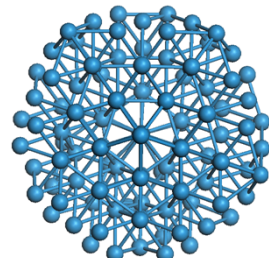

W<sub>118</sub>

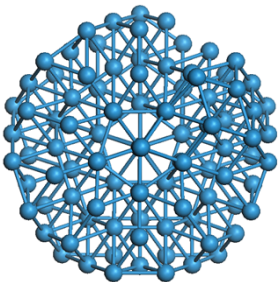

W<sub>119</sub>

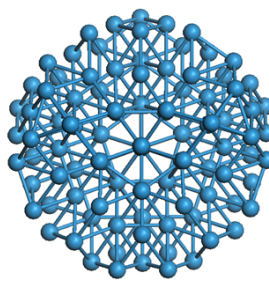

W<sub>120</sub>
